# Supplementary material for: Effect of implementing a heart failure admission care bundle on hospital readmission and mortality rates: interrupted time series study
Source: PubMed Central journal article supplement (PMC10804004; doi:10.1136/bmjqs-2022-015511), 2023-11-05
Supplement: bmjqs-2022-015511supp002.pdf [file bmjqs-2022-015511supp002.pdf]

## Appendix B

### Supplementary table 2: Results of interrupted time series analyses with discontinuous time trends

Caption: Results of interrupted time series analyses for 7-, 30- and 90-day all-cause readmission rates, length of stay and in-hospital mortality for patients discharged following an admission with heart failure. For each intervention-control model, the following estimates are shown with 95% confidence intervals and p-values: pre-intervention slope on the control site compared with no trend, difference in slope from pre- to post-intervention on the control site, difference in slope from control site to intervention site during the pre-intervention period and the difference in difference in slope between control and intervention sites, pre- and post-intervention. The resulting slopes for the control site post-intervention, the intervention site during pre-intervention, and the intervention site post-intervention, are also shown, along with the corresponding differences in slope.

In addition, results are shown for intervention-site-only models for each outcome. This acts as a sensitivity analysis for the relaxation of the time trend continuity constraint in the main analysis. For these intervention-site-only models, the following regression coefficients are given with 95% confidence intervals and p-values: pre-intervention slope (on the intervention site), the difference in slope from pre- to post-intervention (on the intervention site). The resulting post-intervention slope (on the intervention site) is also given. Since all models were multiplicative due to the log link, all differences are ratios.

| Outcome                                                                                                     |                                | Pre-intervention slope          | Slope change ratio              | Post-intervention slope |
|-------------------------------------------------------------------------------------------------------------|--------------------------------|---------------------------------|---------------------------------|-------------------------|
| All-cause readmissions within 7 days<br><br>Poisson regression: slopes are monthly incidence rate ratios    | Control site                   | 0.93 (0.89 – 0.98)<br>p = 0.004 | 1.08 (1.02 – 1.13)<br>p = 0.005 | 1.00                    |
|                                                                                                             | Slope change ratio             | 1.06 (1.01 – 1.11)<br>p = 0.02  | 0.93 (0.88 – 0.99)<br>p = 0.014 | 0.99                    |
|                                                                                                             | Intervention site              | 0.99                            | 1.01                            | 0.99                    |
|                                                                                                             | Intervention site (no control) | 0.95 (0.92 – 0.99)<br>p = 0.005 | 1.03 (1.00 – 1.07)<br>p = 0.08  | 0.98                    |
| All-cause readmissions within 7-30 days<br><br>Poisson regression: slopes are monthly incidence rate ratios | Control site                   | 0.96 (0.93 – 0.99)<br>p = 0.009 | 1.04 (1.00 – 1.08)<br>p = 0.052 | 0.99                    |
|                                                                                                             | Slope change ratio             | 1.04 (1.00 – 1.07)<br>p = 0.033 | 0.95 (0.92 – 0.99)<br>p = 0.014 | 0.99                    |
|                                                                                                             | Intervention site              | 0.99                            | 0.99                            | 0.98                    |
|                                                                                                             | Intervention site (no control) | 0.99 (0.99 – 1.00)<br>p = 0.013 | 0.99 (0.98 – 1.00)<br>p = 0.046 | 0.98                    |

|                                                                                                              |                                |                                 |                                 |      |
|--------------------------------------------------------------------------------------------------------------|--------------------------------|---------------------------------|---------------------------------|------|
| All-cause readmissions within 30-90 days<br><br>Poisson regression: slopes are monthly incidence rate ratios | Control site                   | 0.96 (0.93 – 0.99)<br>p = 0.016 | 1.03 (1.00 – 1.07)<br>p = 0.073 | 0.99 |
|                                                                                                              | Slope change ratio             | 1.02 (0.99 – 1.06)<br>p = 0.13  | 0.97 (0.93 – 1.00)<br>p = 0.06  | 0.99 |
|                                                                                                              | Intervention site              | 0.99                            | 1.00                            | 0.98 |
|                                                                                                              | Intervention site (no control) | 0.99 (0.98 – 0.99)<br>p < 0.001 | 0.98 (0.97 – 0.99)<br>p < 0.001 | 0.97 |
| Length of stay<br><br>Log-linear regression: slopes are monthly ratios                                       | Control site                   | 0.99 (0.98 – 1.00)<br>p = 0.033 | 1.01 (1.00 – 1.03)<br>p = 0.028 | 1.00 |
|                                                                                                              | Slope change ratio             | 1.01 (1.00 – 1.02)<br>p = 0.042 | 0.99 (0.97 – 1.00)<br>p = 0.027 | 1.00 |
|                                                                                                              | Intervention site              | 1.00                            | 1.00                            | 1.00 |
|                                                                                                              | Intervention site (no control) | 1.00 (1.00 – 1.00)<br>p = 0.6   | 1.00 (1.00 – 1.00)<br>p = 0.62  | 1.00 |
| In-hospital mortality<br><br>Poisson regression: slopes are monthly incidence rate ratios                    | Control site                   | 0.94 (0.91 – 0.98)<br>p = 0.003 | 1.07 (1.02 – 1.11)<br>p = 0.003 | 1.01 |
|                                                                                                              | Slope change ratio             | 1.05 (1.01 – 1.10)<br>p = 0.01  | 0.92 (0.88 – 0.96)<br>p < 0.001 | 0.96 |
|                                                                                                              | Intervention site              | 0.99                            | 0.98                            | 0.97 |
|                                                                                                              | Intervention site (no control) | 0.99 (0.99 – 1.00)<br>p = 0.008 | 0.97 (0.96 – 0.99)<br>p < 0.001 | 0.97 |
