# Supplementary material for: Effect of implementing a heart failure admission care bundle on hospital readmission and mortality rates: interrupted time series study
Source: PubMed Central journal article supplement (PMC10804004; doi:10.1136/bmjqs-2022-015511), 2023-11-05
Supplement: bmjqs-2022-015511supp004.pdf [file bmjqs-2022-015511supp004.pdf]

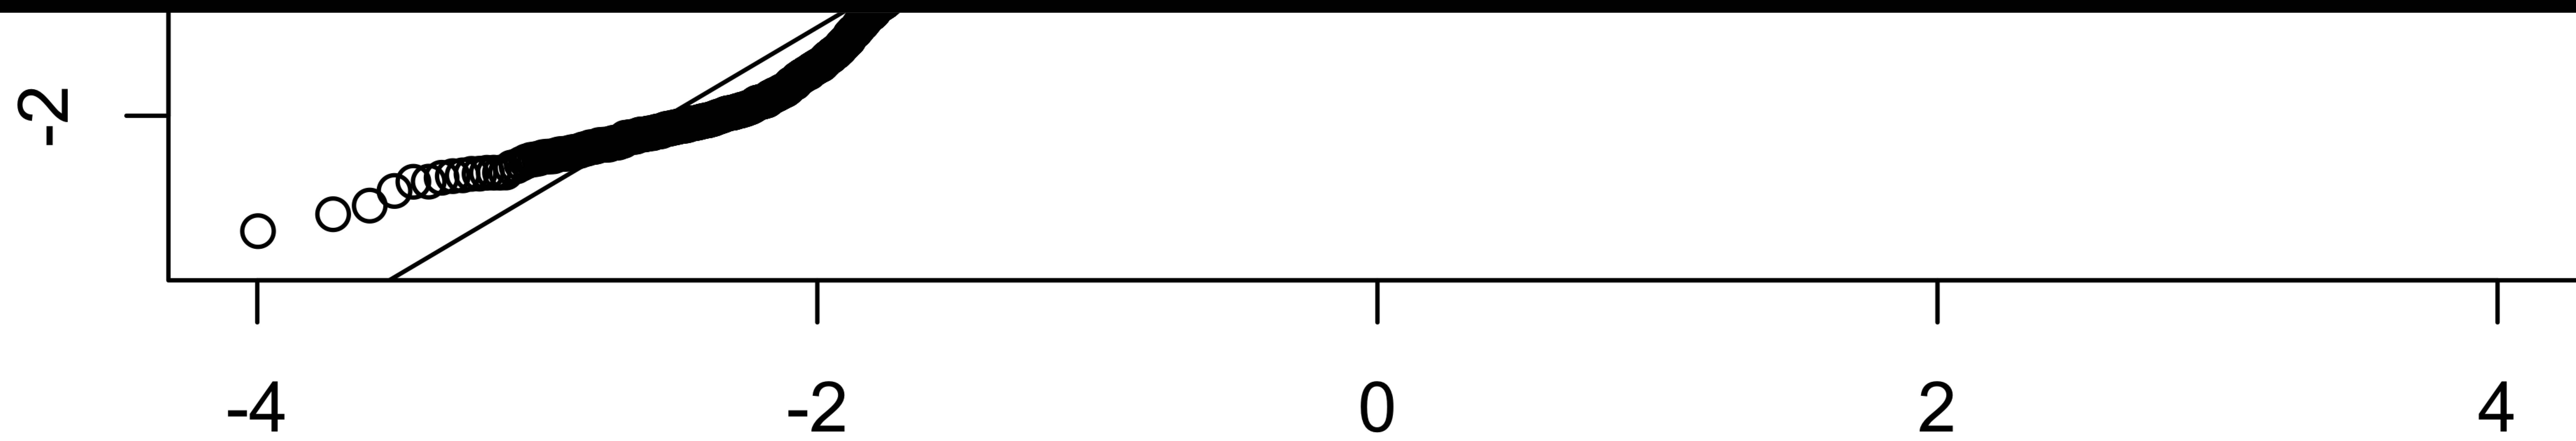

Theoretical Quantiles
